# Supplementary material for: Disrupted sleep patterns and atypical electroencephalograms in children admitted to the pediatric intensive care unit: an observational cohort study
Source: Research Square preprint supplement (doi:10.21203/rs.3.rs-8174098/v1), 2025-11-28
Supplement: Supplementary file 1 [file 9f5f6db0f96e8bd8a32648fa.pdf]

# Supplementary Material

## Disrupted sleep patterns and atypical electroencephalograms in children admitted to the pediatric intensive care unit: an observational cohort study

MSc. E. van Twist<sup>1</sup>, MSc. A.B.G. Cramer<sup>1</sup>, MD, dr. S.C.A.T. Verbruggen<sup>1</sup>, MD, PhD, dr. M. Louter<sup>2</sup>,  
MD, PhD, dr. K. Veldscholte<sup>1</sup>, MD, PhD, prof. dr. K.F.M. Joosten<sup>1</sup>, MD, PhD, prof. dr. M. de Hoog<sup>1</sup>,  
MD, PhD, K. Biesheuvel<sup>2</sup>, dr. D.C.G. Straver<sup>2</sup>, MD, PhD, dr. R.C.J. de Jonge<sup>1</sup>, MD, PhD

<sup>1</sup>Department of Neonatal and Pediatric Intensive Care, Division of Pediatric Intensive Care, Erasmus MC Sophia  
Children's Hospital, Rotterdam, The Netherlands

<sup>2</sup>Department of Neurology, Division of Clinical Neurophysiology,, Erasmus MC, Rotterdam, The Netherlands

### Table of contents

|                                                                                                   |    |
|---------------------------------------------------------------------------------------------------|----|
| <i>Supplemental Methods</i>                                                                       | 2  |
| A. Reference ranges                                                                               | 2  |
| B. Software and package                                                                           | 2  |
| <i>Supplemental Tables</i>                                                                        | 3  |
| Table S1. Reference ranges per parameter and age category                                         | 3  |
| Table S2. All sleep parameters of critically ill children compared to literature reference ranges | 4  |
| Table S2. All mean sleep parameters in the SDB group compared to literature reference ranges      | 5  |
| <i>Supplemental Figures</i>                                                                       | 6  |
| Figure S1. Flow chart of patient inclusion and exclusion                                          | 6  |
| Figure S2. Hypnograms of all critically ill patients                                              | 6  |
| <i>References</i>                                                                                 | 12 |

## Supplemental Methods

### A. Reference ranges

Literature sources for references range per parameter are specified across age categories in Table S1 on the next page. In children younger than one month, total sleep time (TST) and sleep efficiency reported by Daftary et al. were adjusted for the difference in measurement duration (i.e. TST divided by 0.6).(1) Sleep stage distributions for this age category were derived from the distribution of REM and NREM sleep of the youngest age category reported by Duenas-Meza et al.(2) For ages one to six months, TST reference ranges were obtained from Kato et al. who used the Rechtschaffen & Kales classification.(3) For ages six months to one year, TST ranges were interpolated between the 20 to 27 weeks group of Kato et al. and the one to two-year-old group of Scholle et al.(3, 4) For patients aged five years and older, 24-hour TST was compared to reference ranges for nighttime sleep only, assuming no habitual daytime sleep in this age category.

### B. Software and packages

We used python (version 3.11) with packages *os*, *pyedflib* (0.1.22), *datetime*, *pandas* (1.3.4), *math*, *numpy* (1.21.3), *matplotlib* (3.5.1) and a script based on *yasa* (0.6.2) for extraction and plotting of the hypnogram from the BrainRT export, and R (version 4.3.0), with packages *dplyr* (2.3.2), *ggplot2* (3.444.222), *ggsci* (3.0.0), *hms* (1.1.3), *openxlsx* (4.2.5.2), *readxl* (1.4.2) for the analyses.(5-13)

## Supplemental Tables

**Table S1. Reference ranges per parameter and age category**

| Age category                                                                                          | Source                      | Comment                                                                            |
|-------------------------------------------------------------------------------------------------------|-----------------------------|------------------------------------------------------------------------------------|
| <i>Total sleep time (TST)</i>                                                                         |                             |                                                                                    |
| < 1 month                                                                                             | Daftary et al.              | Corrected for difference in measurement duration                                   |
| 1 – 6 months                                                                                          | Kato et al.                 | Rechtschaffen & Kales classification guidelines                                    |
| 6 – 12 months                                                                                         | Kato et al., Scholle et al. | Interpolated between ages 20 – 27 weeks (Kato et al.) and 2 years (Scholle et al.) |
| ≥ 1 year                                                                                              | Scholle et al.              |                                                                                    |
| <i>Sleep efficiency (SE)</i>                                                                          |                             |                                                                                    |
| < 1 month                                                                                             | Daftary et al.              | Corrected for difference in measurement duration                                   |
| 1 – 12 months                                                                                         | Duenas-Mezas et al.         |                                                                                    |
| ≥ 1 year                                                                                              | Scholle et al.              |                                                                                    |
| <i>Sleep stage distributions (% REM, NREM, N1, N2, N3)</i>                                            |                             |                                                                                    |
| < 1 month                                                                                             | Duenas-Mezas et al.         | Derived from REM-NREM distributions of the youngest age category                   |
| 1 – 12 months                                                                                         | Duenas-Mezas et al.         | Only REM-NREM distributions available                                              |
| ≥ 1 year                                                                                              | Scholle et al.              |                                                                                    |
| <i>Awakening index (AI)</i>                                                                           |                             |                                                                                    |
| < 1 month                                                                                             | Daftary et al.              |                                                                                    |
| 1 – 12 months                                                                                         | Unavailable                 |                                                                                    |
| ≥ 1 year                                                                                              | Scholle et al.              |                                                                                    |
| <i>Sleep period duration (SPD)</i>                                                                    |                             |                                                                                    |
| < 1 month                                                                                             | Unavailable                 |                                                                                    |
| 1 – 12 months                                                                                         | Unavailable                 |                                                                                    |
| ≥ 1 year                                                                                              | Scholle et al.              |                                                                                    |
| REM = rapid-eye movement; NREM = non-rapid eye movement; N1 – N3 = non-rapid eye movement stage 1 – 3 |                             |                                                                                    |

**Table S2. All sleep parameters of critically ill children compared to literature reference ranges**

| Participant | Age         | 24h TST (min) | Nighttime TST (min) | Nighttime sleep (%) | REM (%TST) | NREM (%TST) | N1 (%TST) | N2 (%TST) | N3 (%TST) | SE (% SPT) | SPD (min) | AI (n/h) |
|-------------|-------------|---------------|---------------------|---------------------|------------|-------------|-----------|-----------|-----------|------------|-----------|----------|
| 1           | 0-1 months  | 918           | 378                 | 49.0                | 44.8       | 55.2        | 0.0       | 0.0       | 0.0       | 63.1       | 5.5       | 10.84    |
| 2           | 0-1 months  | 984.5         | 413.5               | 49.5                | 17.9       | 82.1        | 0.0       | 0.0       | 0.0       | 69.0       | 263.0     | 0.49     |
| 3           | 0-1 months  | 1230.5        | 545.5               | 49.4                | 37.5       | 62.5        | 0.0       | 0.0       | 0.0       | 91.0       | 14.4      | 4.18     |
| 4           | 0-1 months  | 1018          | 534                 | 50.9                | 0.7        | 99.3        | 0.0       | 0.0       | 0.0       | 89.9       | 23.9      | 2.51     |
| 5           | 0-1 months  | 771.5         | 435                 | 57.0                | 29.4       | 70.6        | 0.0       | 0.0       | 0.0       | 72.6       | 13.6      | 4.40     |
| 6           | 0-1 months  | 700           | 393                 | 51.1                | 30.8       | 69.2        | 0.0       | 0.0       | 0.0       | 65.6       | 6.8       | 8.81     |
| 7           | 1-2 months  | 850           | 405                 | 54.5                | 24.0       | 76.0        | 0.0       | 0.0       | 0.0       | 71.0       | 9.9       | 6.14     |
| 8           | 1-2 months  | 474           | 357.5               | 65.8                | 36.1       | 63.9        | 0.0       | 0.0       | 0.0       | 60.1       | 3.8       | 15.70    |
| 9           | 1-2 months  | 925.5         | 437                 | 48.5                | 25.3       | 74.7        | 0.0       | 0.0       | 0.0       | 72.9       | 10.4      | 5.80     |
| 10          | 2-6 months  | 599           | 260.5               | 50.6                | 18.2       | 81.8        | 0.0       | 0.0       | 0.0       | 43.5       | 9.1       | 6.68     |
| 11          | 2-6 months  | 1176.5        | 543.5               | 50.6                | 8.5        | 91.5        | 0.0       | 0.0       | 0.0       | 91.0       | 28.2      | 2.14     |
| 12          | 2-6 months  | 744.5         | 433                 | 55.7                | 10.3       | 89.7        | 0.0       | 0.0       | 0.0       | 85.6       | 25.5      | 2.36     |
| 13          | 2-6 months  | 829           | 385.5               | 49.4                | 8.7        | 91.3        | 0.0       | 0.0       | 0.0       | 64.3       | 10.5      | 5.82     |
| 14          | 2-6 months  | 561           | 223.5               | 44.1                | 5.4        | 0.0         | 11.4      | 4.0       | 79.2      | 38.5       | 14.5      | 4.13     |
| 15          | 2-6 months  | 1090.5        | 517                 | 55.2                | 13.7       | 39.1        | 0.0       | 13.4      | 33.8      | 86.2       | 25.9      | 2.49     |
| 16          | 2-6 months  | 239           | 83                  | 29.2                | 0.0        | 100.0       | 0.0       | 0.0       | 0.0       | 14.1       | 4.9       | 12.29    |
| 17          | 6-12 months | 636           | 366.5               | 55.5                | 0.0        | 2.9         | 38.6      | 47.1      | 11.5      | 62.3       | 12.5      | 4.79     |
| 18          | 1-3 years   | 1348          | 578.5               | 51.3                | 4.5        | 0.0         | 14.6      | 52.5      | 28.4      | 96.5       | 20.5      | 2.93     |
| 19          | 1-3 years   | 842           | 459.5               | 56.5                | 11.3       | 0.0         | 16.2      | 53.2      | 19.3      | 77.4       | 15.3      | 4.20     |
| 20          | 5-9 years   | 785.5         | 390                 | 50.6                | 8.5        | 0.0         | 26.7      | 57.7      | 7.2       | 67.5       | 16.0      | 3.74     |
| 21          | 9-13 years  | 592.5         | 342.5               | 59.0                | 0.0        | 0.0         | 42.2      | 54.2      | 3.6       | 57.1       | 18.6      | 3.37     |
| 22          | 13-18 years | 1094          | 552                 | 50.3                | 0.0        | 73.9        | 0.0       | 21.8      | 4.3       | 92.1       | 90.1      | 0.72     |
| 23          | 13-18 years | 535.5         | 261                 | 44.5                | 3.8        | 0.0         | 11.1      | 54.4      | 30.7      | 43.5       | 19.6      | 3.11     |
| 24          | 13-18 years | 617           | 323                 | 56.4                | 0.0        | 0.0         | 46.1      | 50.6      | 3.3       | 53.9       | 9.8       | 6.10     |
| 25          | 13-18 years | 1167.5        | 575                 | 51.8                | 0.0        | 100.0       | 0.0       | 0.0       | 0.0       | 95.9       | 57.6      | 1.04     |

All sleep characteristics (columns) of individual patients (rows, in order of increasing age) and the corresponding values which are either in range (black), below range (blue) or above range (red) with regard to reference ranges of healthy controls. Grey values represent values for which no valid reference range was found. All values except for 24h TST are calculated for nighttime only. The nighttime sleep proportion was corrected for the daytime and nighttime measurement duration. Up two months of age, we assumed differentiation of different NREM stages is not yet present in healthy children. AI = awakening index; NREM = non-rapid-eye-movement sleep (N); REM = rapid-eye-movement sleep; SE = Sleep efficiency; SPD = mean sleep period duration; SPT = sleep period time; TST = total sleep time

**Table S3. All mean sleep parameters in the SDB group compared to literature reference ranges**

| Age group   | TST (min) | REM (%TST) | NREM (%TST) | N1 (%TST) | N2 (%TST) | N3 (%TST) | SE (% SPT) | SPD (min) | AI (n/h) |
|-------------|-----------|------------|-------------|-----------|-----------|-----------|------------|-----------|----------|
| 0-2 months  | 498.7     | 34.4       | 59.5        | 0.5       | 0.0       | 5.6       | 71.7       | 8.56      | 7.95     |
| 2-6 months  | 524.6     | 32.0       | 20.1        | 5.4       | 14.0      | 28.5      | 81.7       | 22.89     | 3.29     |
| 6-12 months | 535.0     | 28.7       | 0.0         | 11.5      | 27.5      | 32.2      | 85.5       | 31.40     | 2.12     |
| 1-3 years   | 493.3     | 22.6       | 0.0         | 15.1      | 28.9      | 33.4      | 83.9       | 42.04     | 1.88     |
| 3-5 years   | 540.5     | 21.6       | 0.0         | 9.5       | 27.3      | 41.6      | 89.6       | 56.37     | 1.55     |
| 5-9 years   | 507.0     | 21.5       | 0.0         | 9.0       | 35.6      | 33.9      | 86.0       | 61.70     | 1.69     |
| 9-13 years  | 408.8     | 16.2       | 0.0         | 14.9      | 32.7      | 36.3      | 77.1       | 34.00     | 3.48     |
| 13-18 years | 412.7     | 17.9       | 0.0         | 13.2      | 38.0      | 30.8      | 82.2       | 28.41     | 2.97     |

All sleep characteristics (columns) per age category (rows, in order of increasing age) and the corresponding values which are either in range (black), below range (blue) or above range (red) with regard to reference ranges of healthy controls. Grey values represent values for which no valid reference range was found. AI = awakening index; NREM = non-rapid-eye-movement sleep (N); REM = rapid-eye-movement sleep; SDB = sleep disordered breathing; SE = Sleep efficiency; SPD = average sleep period duration; SPT = sleep period time; TST = total sleep time

## Supplemental Figures

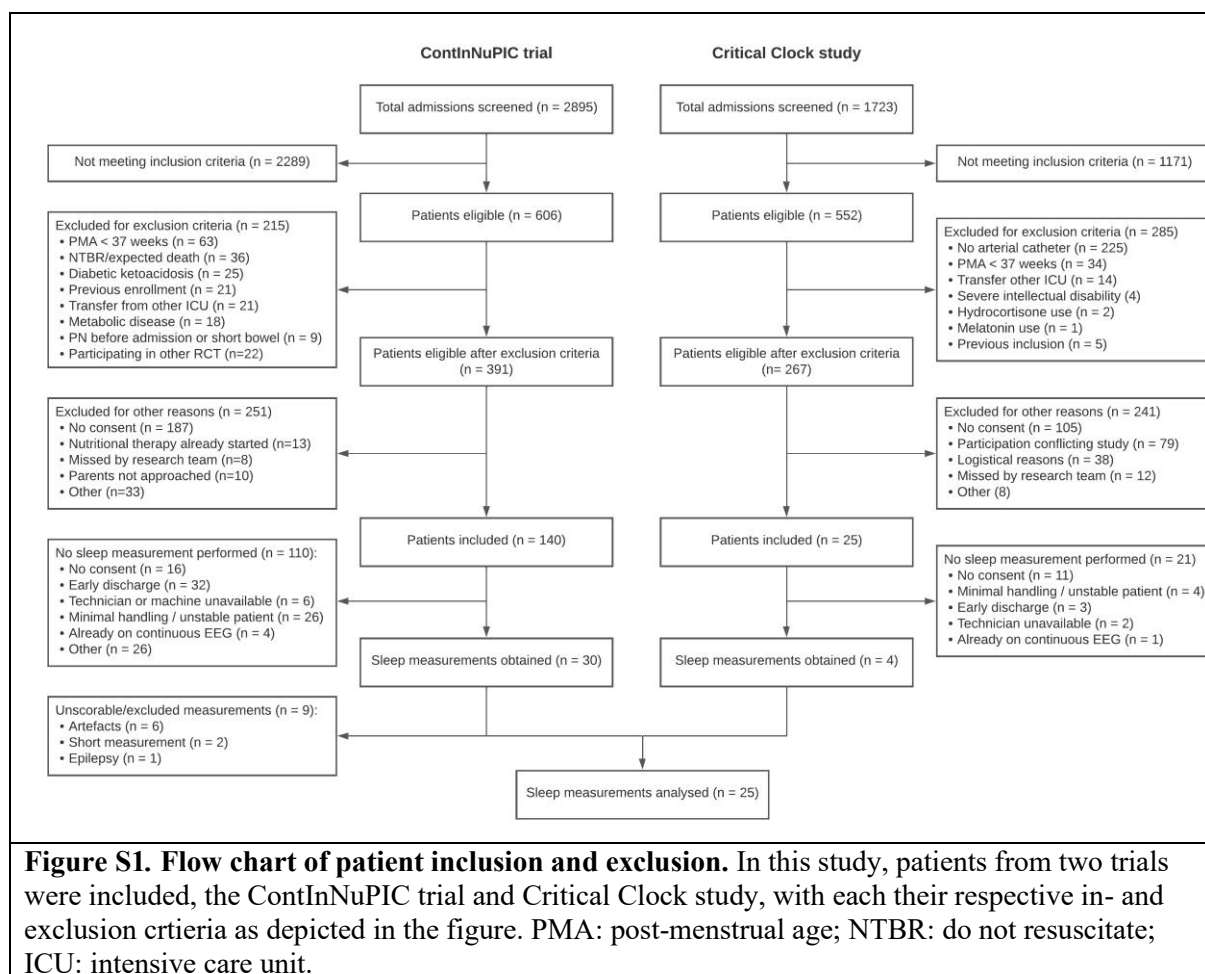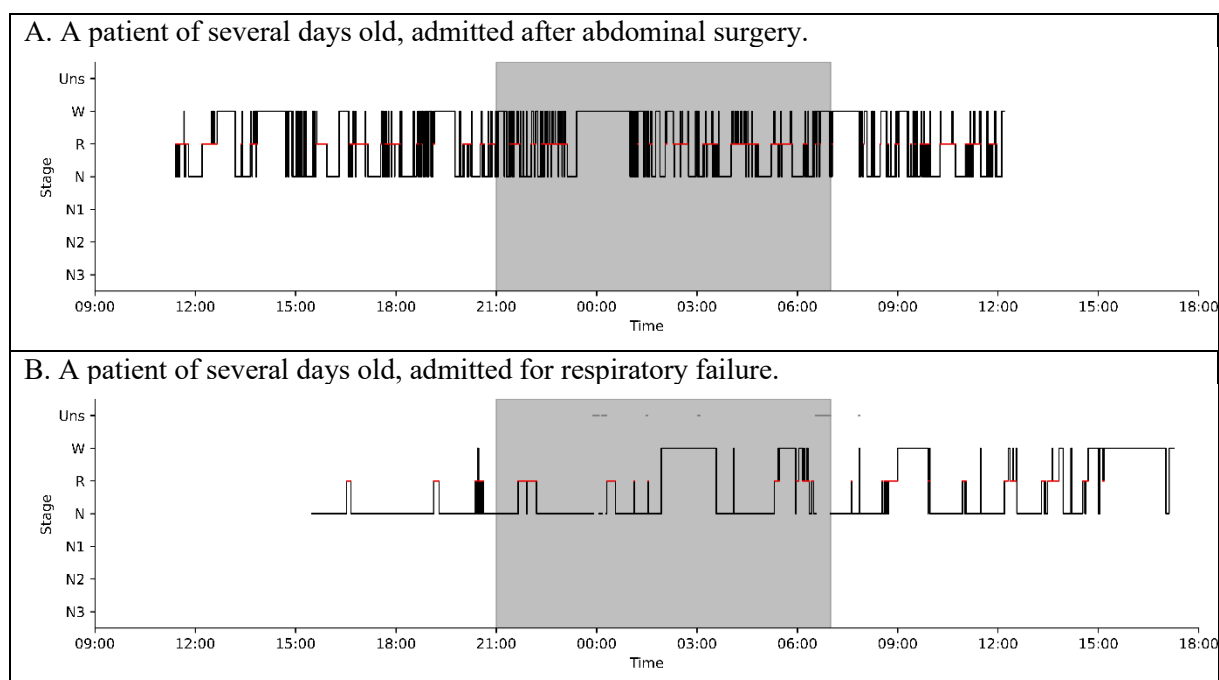

C. A patient of one week old, admitted for respiratory failure and asphyxia.

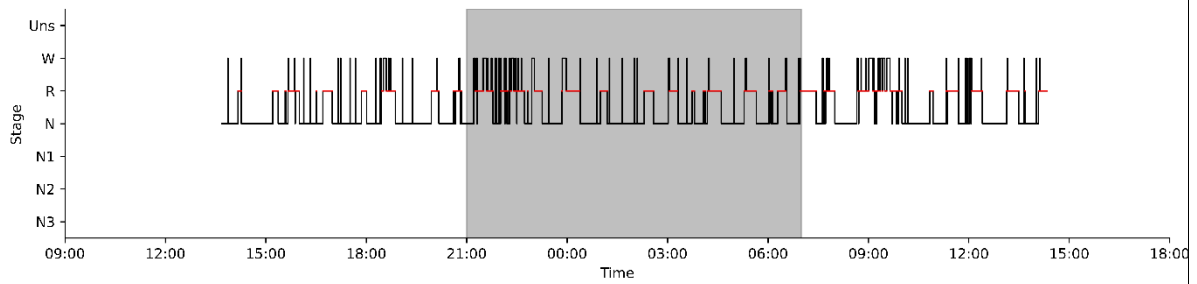

D. A patient of one week old, admitted for a metabolic condition.

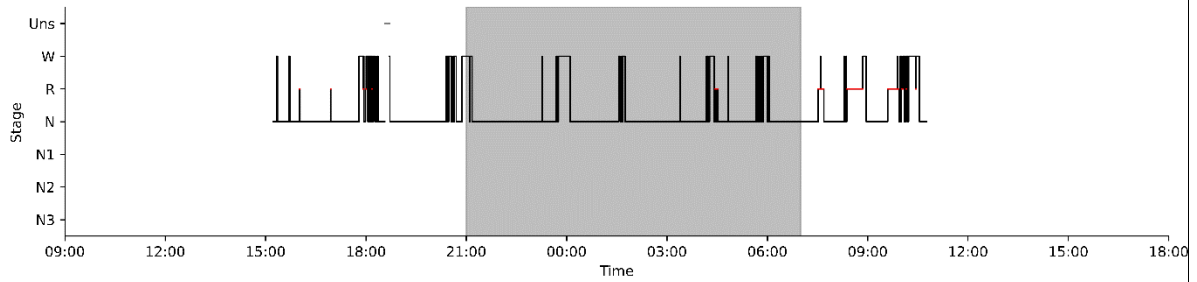

E. A patient of one week old, admitted for congenital heart disease.

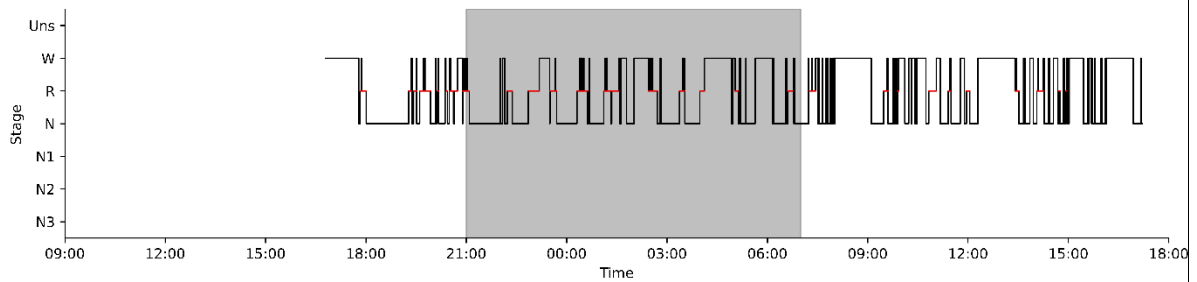

F. A patient of several weeks old, admitted for congenital heart disease.

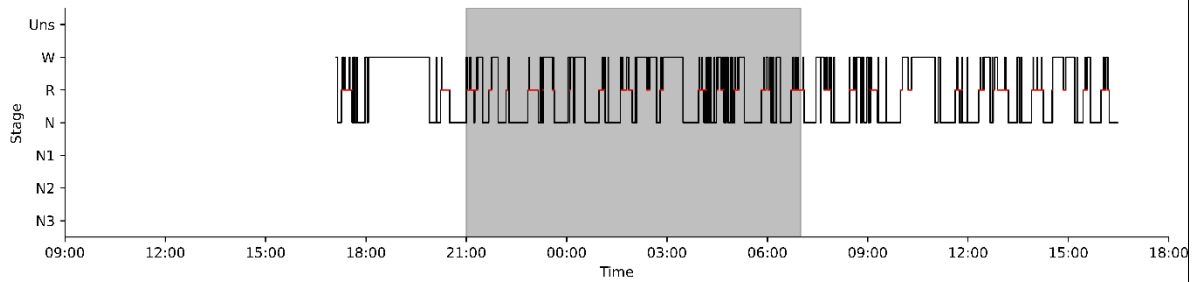

G. A patient of one month old, admitted for a neuromuscular disease.

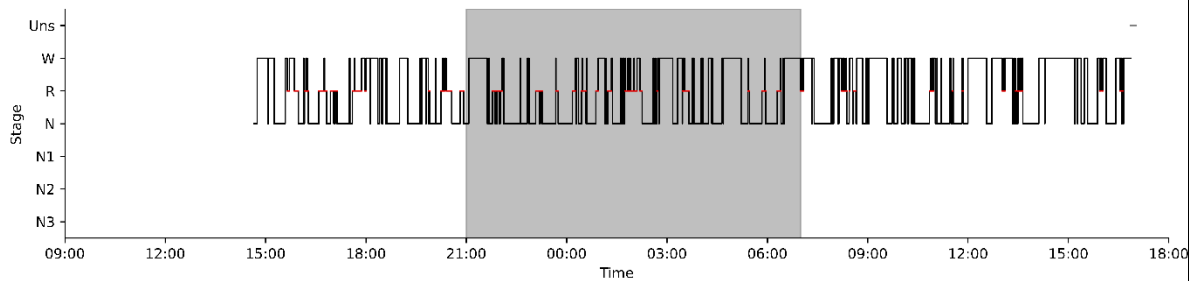

H. A patient of one month old, admitted for respiratory failure

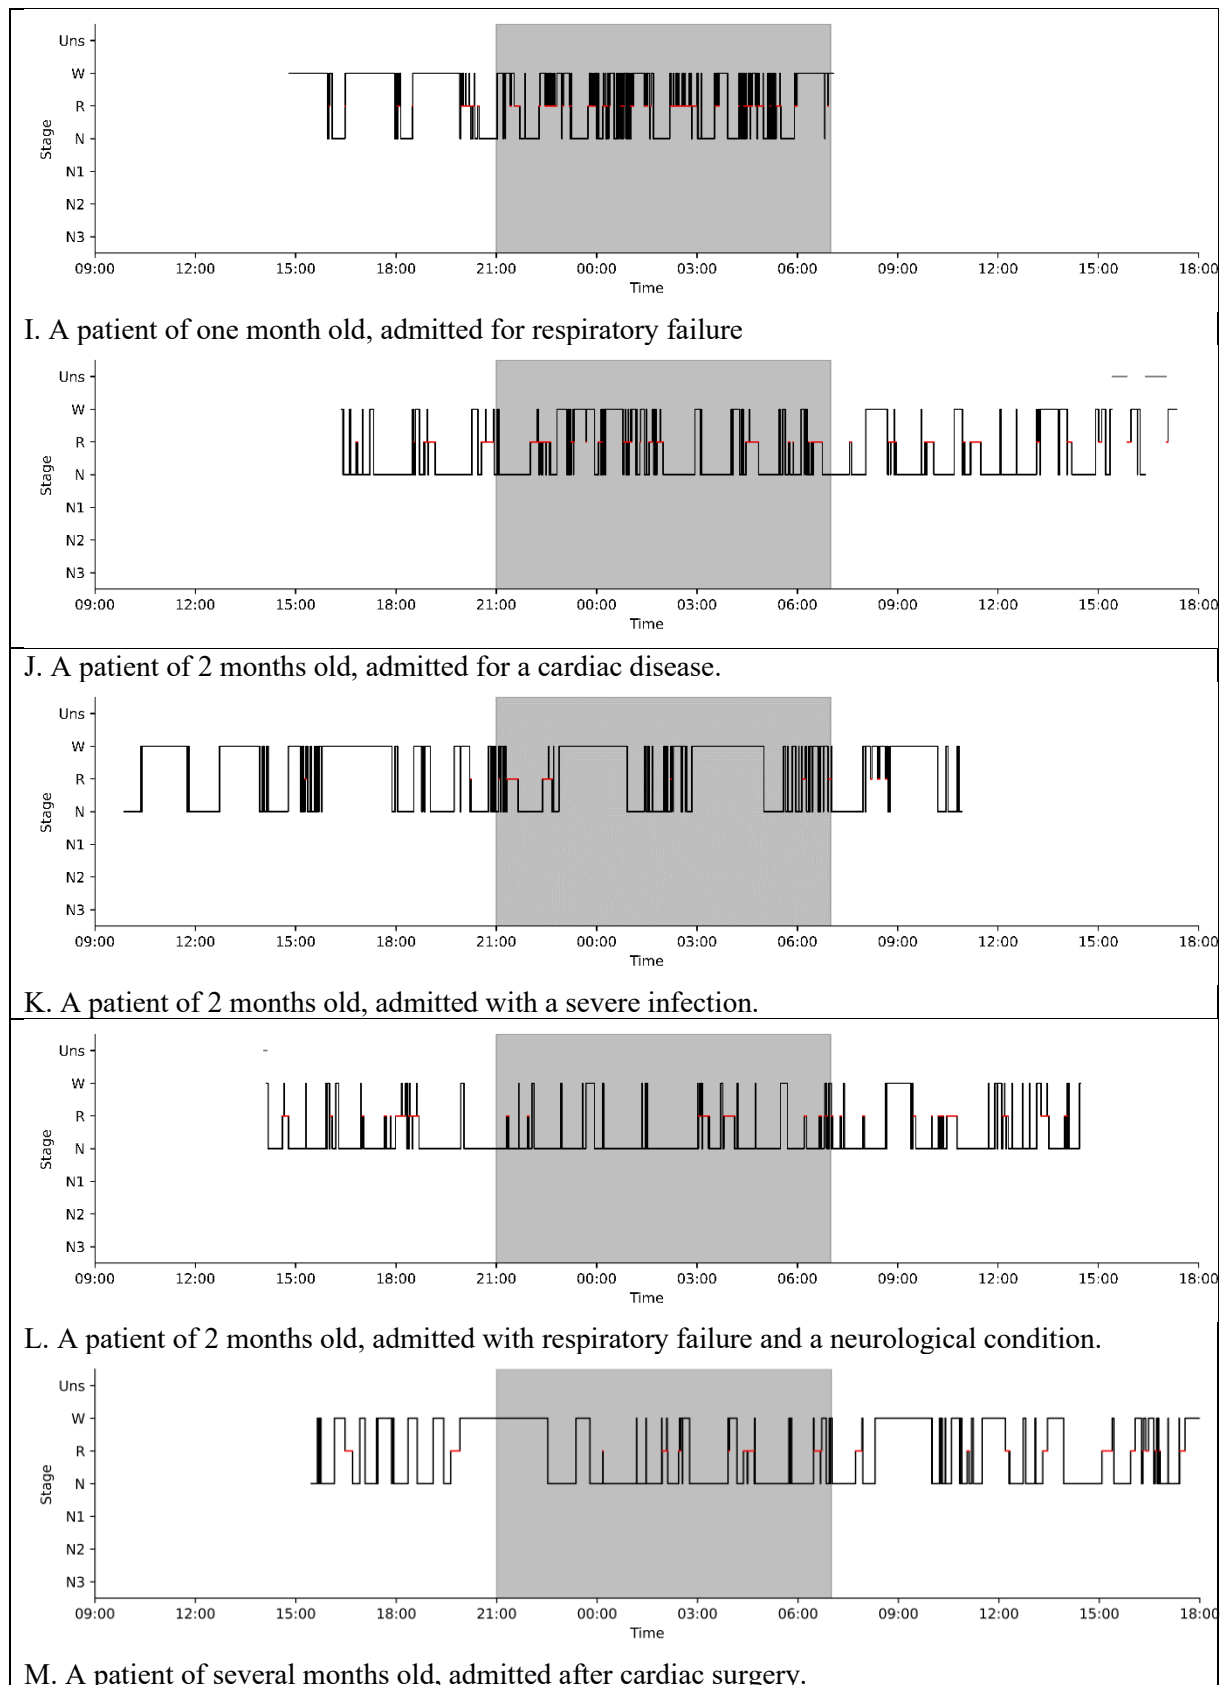



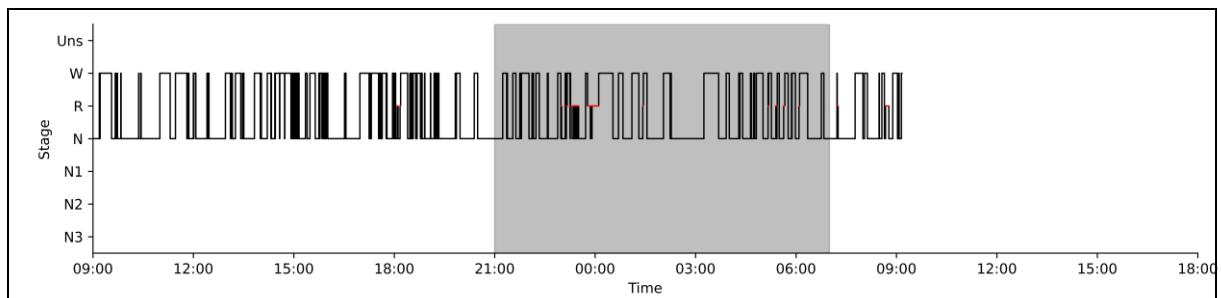

N. A patient of several months old, admitted after cardiac surgery.

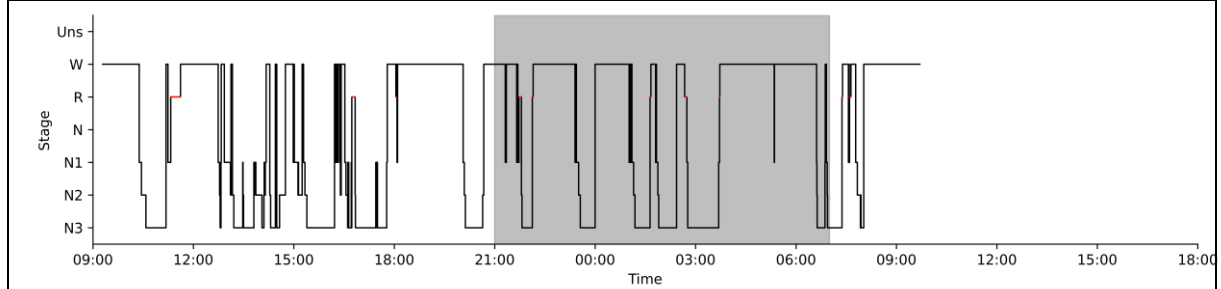

O. A patient of several months old, admitted for congenital heart disease.

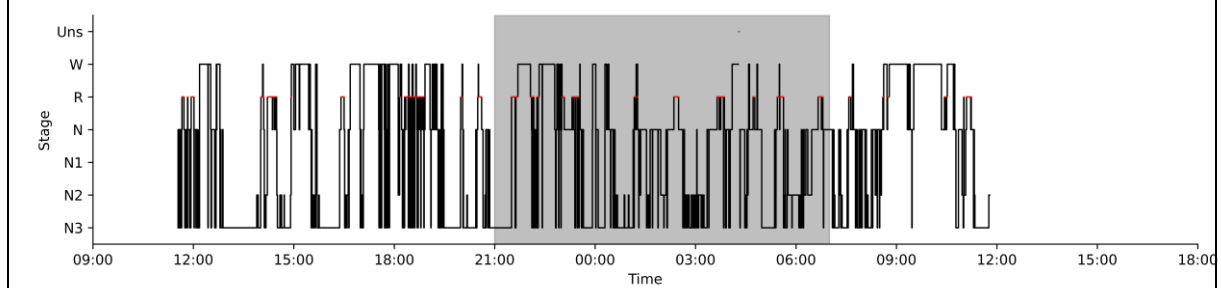

P. A patient of several months old, admitted after cardiac surgery.

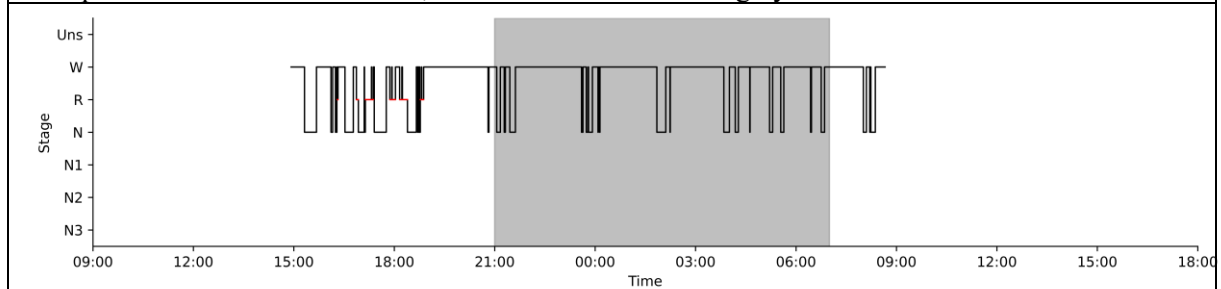

Q. A patient of six to twelve months old, admitted after cardiac surgery.

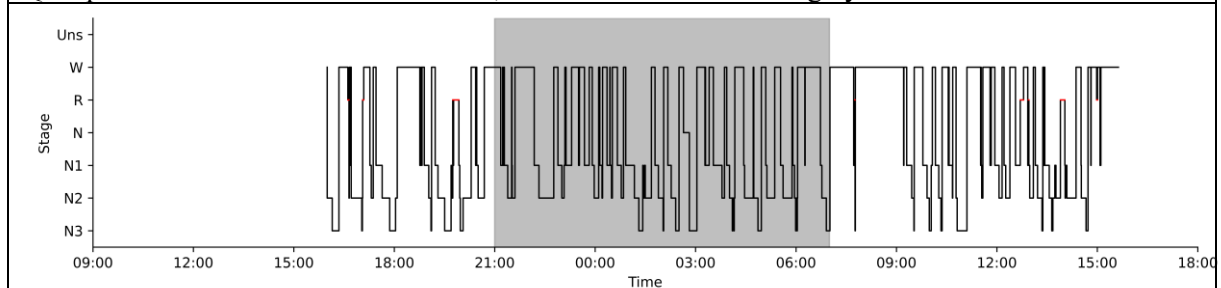

R. A patient of one year old, admitted for respiratory failure.

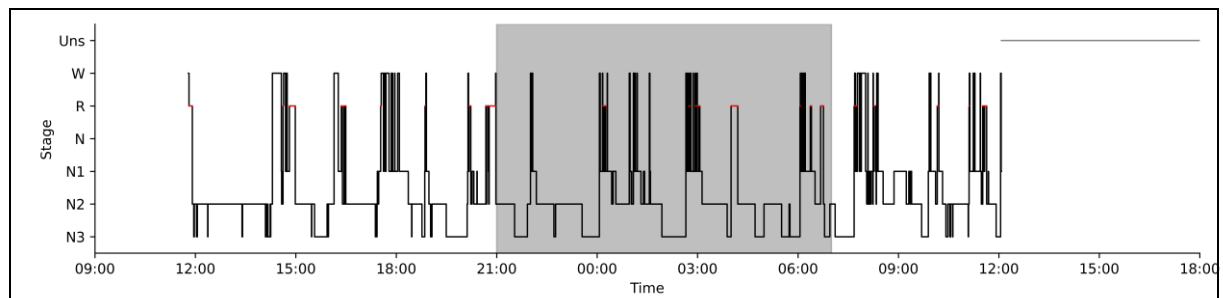

S. A patient of one year old, admitted for respiratory failure.

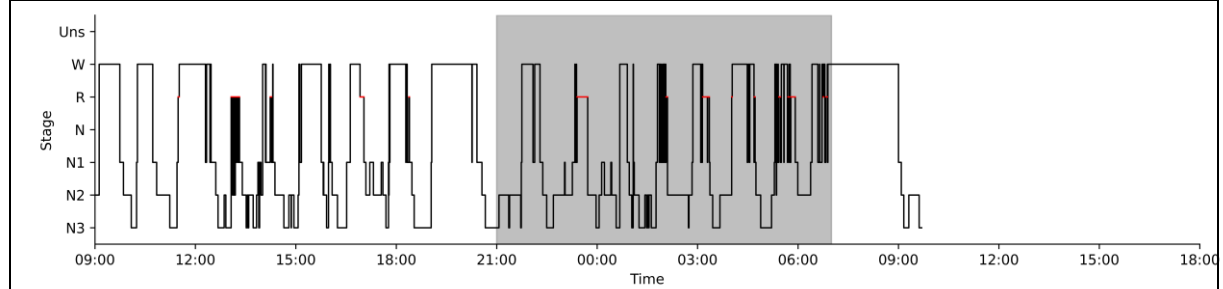

T. A patient of 5-9 years old, suffering from a malignancy.

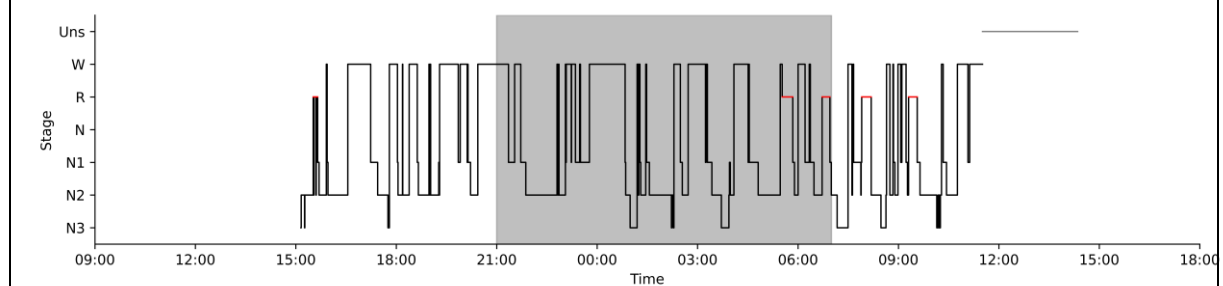

U. A patient of 9-13 years old, suffering from a severe infection.

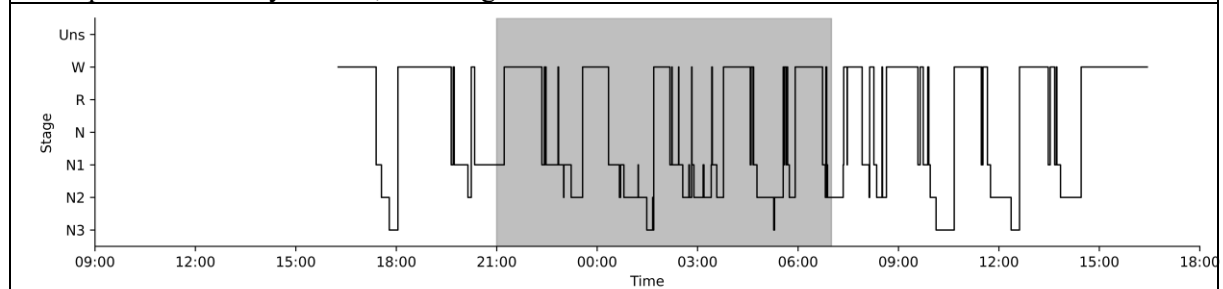

V. A patient of 13-18 years old, suffering from a neurological condition.

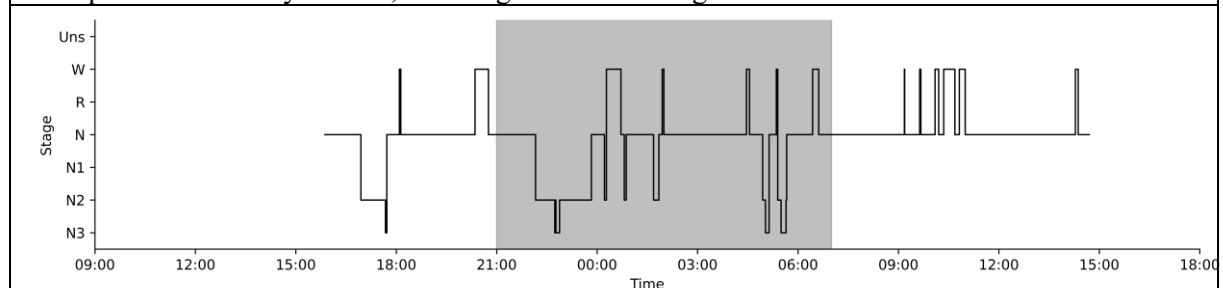

W. A patient of 13-18 years old with a severe infection, after resuscitation.

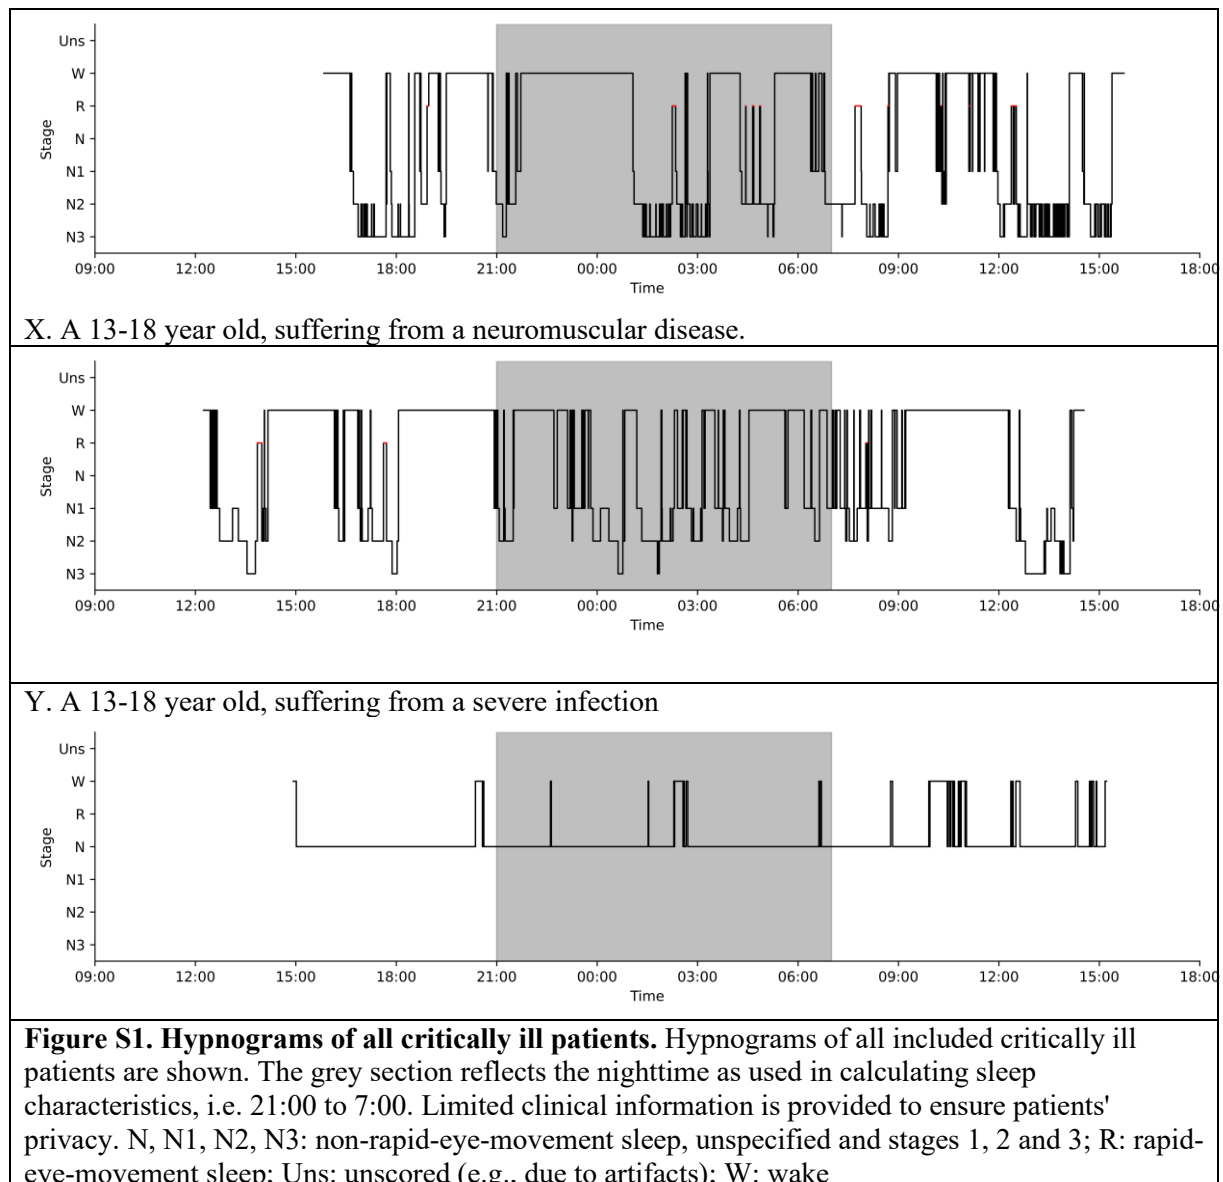

## References

1. Daftary AS, Jalou HE, Shively L, et al: Polysomnography Reference Values in Healthy Newborns. *J Clin Sleep Med* 2019; 15(03):437-443
2. Duenas-Meza E, Bazurto-Zapata MA, Gozal D, et al: Overnight Polysomnographic Characteristics and Oxygen Saturation of Healthy Infants, 1 to 18 Months of Age, Born and Residing At High Altitude (2,640 Meters). *Chest* 2015; 148(1):120-127
3. Kato I, Franco P, Groswasser J, et al: Frequency of obstructive and mixed sleep apneas in 1,023 infants. *Sleep* 2000; 23(4):487-492
4. Scholle S, Beyer U, Bernhard M, et al: Normative values of polysomnographic parameters in childhood and adolescence: Quantitative sleep parameters. *Sleep Medicine* 2011; 12(6):542-549
5. Harris CR, Millman KJ, van der Walt SJ, et al: Array programming with NumPy. *Nature* 2020; 585(7825):357-362
6. Nahrstaedt H: PyEDFlib: Python library for EDF. Available at: <https://github.com/holgern/pyedflib>. Accessed 30 June, 2023
7. Hunter JD: Matplotlib: A 2D graphics environment. *Computing in Science & Engineering* 2007; 9(3):90-95-90-95
8. Vallat R, Walker MP: An open-source, high-performance tool for automated sleep staging. *eLife* 2021; 10:e70092
9. Team R: RStudio: Integrated Development for R. 2023.03.0 ed. Boston, MA, RStudio, PBC, 2020, p<sup>pp</sup>
10. McKinney W: Data Structures for Statistical Computing in Python. *In: Proceedings of the 9th Python in Science Conference* van der Walt S, Millman J, (Eds). 2010, pp 56 - 61-61
11. Rossum GV: The Python Library Reference. Accessed
12. Hadley Wickham RF, Lionel Henry, Kirill Müller, Vaughan D: dplyr: A Grammar of Data Manipulation. Available at: <https://dplyr.tidyverse.org>. Accessed
13. Wickham H: ggplot2: Elegant Graphics for Data Analysis. Springer-Verlag New York, 2016
